# Supplementary material for: A facile solvothermal synthesis of Pt1.2Co/C bimetallic nanocrystals as efficient electrocatalysts for methanol oxidation and hydrogen evolution reaction
Source: Royal Society of Chemistry journal article supplement (doi:10.1039/d0nj00242a), 2020-01-01
Supplement: d0nj00242a1.pdf [file d0nj00242a1.pdf]

Electronic Supplementary Information

**Facile Solvothermal Synthesis of Pt<sub>1.2</sub>Co/C Bimetallic Nanocrystals as Efficient Electrocatalysts for Methanol Oxidation and Hydrogen Evolution Reaction**

*Xilong Wang,<sup>†</sup> Chen Yang,<sup>†,‡</sup> Lijuan Cao,<sup>†,‡</sup> Han-Pu Liang<sup>†,‡,\*</sup>*

*<sup>†</sup>Qingdao Institute of Bioenergy and Bioprocess Technology, Chinese Academy of Sciences, Qingdao, 266101, China*

*<sup>‡</sup>Center of Materials Science and Optoelectronics Engineering, University of Chinese Academy of Sciences, Beijing 100049, China*

*\*Corresponding author: Han-Pu Liang*

*E-mail addresses: [lianghp@qibebt.ac.cn](mailto:lianghp@qibebt.ac.cn)*

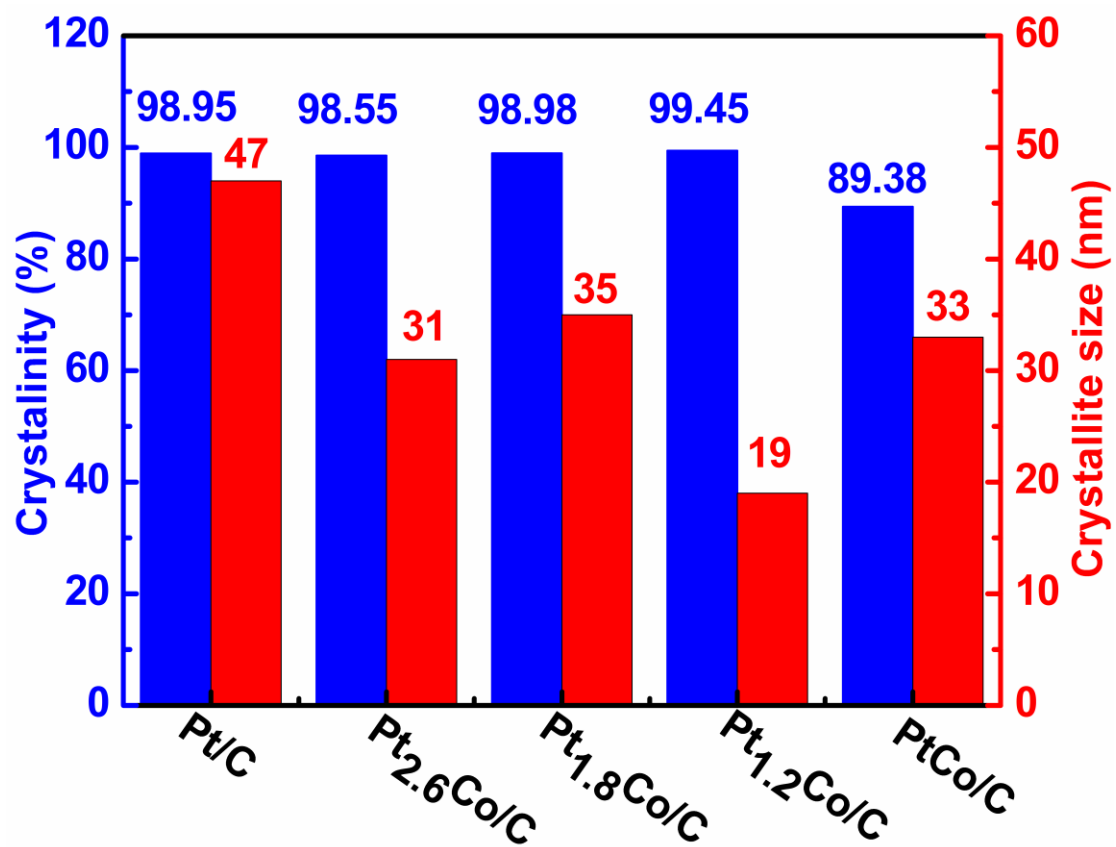

Figure S1. Crystallinity and crystallite size of Pt<sub>x</sub>Co<sub>y</sub> nanoalloys in the as-synthesized Pt<sub>x</sub>Co<sub>y</sub>/C electrocatalysts.

Table S1. The atom ratio of Pt/Co determined by the inductively coupled plasma atomic emission spectroscopy (ICP-AES)

| Sample                                                | Alloy mass loading (wt%) | Pt content (mg/kg) | Co content (mg/kg) | Pt/Co atom ratio |
|-------------------------------------------------------|--------------------------|--------------------|--------------------|------------------|
| Pt <sub>2.6</sub> Co/C                                | 19.874                   | 177962.300         | 20774.100          | 2.548            |
| Pt <sub>1.8</sub> Co/C                                | 17.222                   | 147556.000         | 24661.900          | 1.780            |
| Pt <sub>1.2</sub> Co/C                                | 16.527                   | 131759.010         | 33511.680          | 1.190            |
| Pt <sub>1.2</sub> Co/C after stability test for 1000s | 13.728                   | 127477.000         | 9799.200           | 3.869            |
| PtCo                                                  | 16.348                   | 158420.200         | 50567.500          | 1.055            |

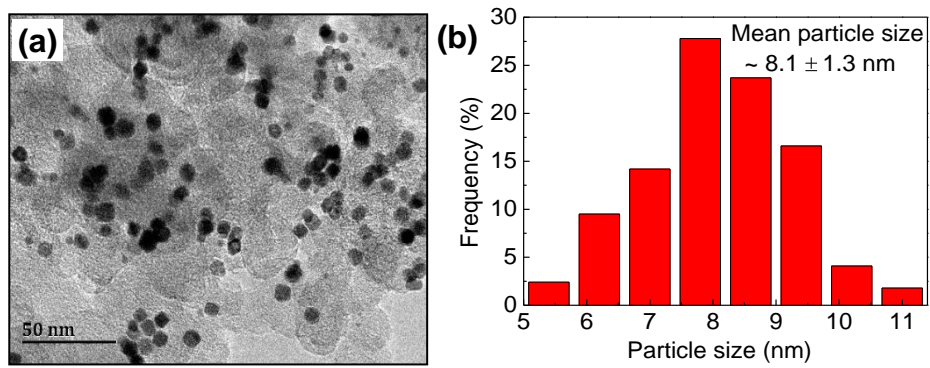

Figure S2. (a) TEM image and (b) histograms of particle size distribution of as-synthesized Pt/C catalyst sample.

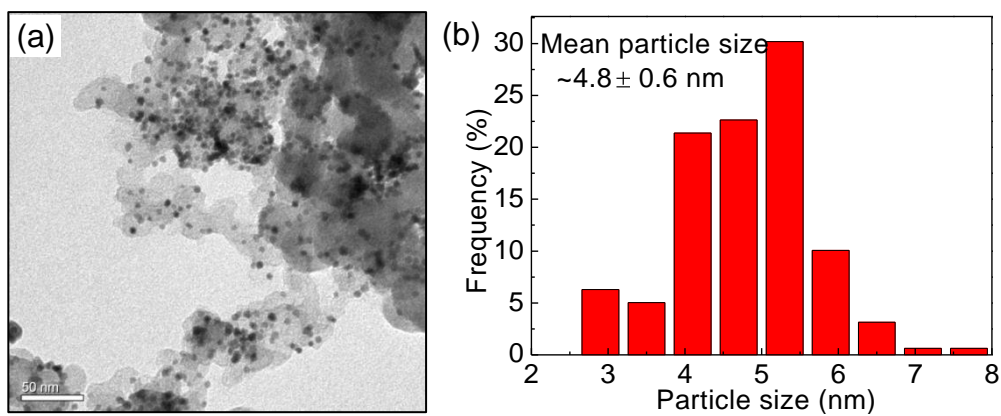

Figure S3. (a) TEM image and (b) histograms of particle size distribution of as-synthesized Pt<sub>2.6</sub>Co/C catalyst sample.

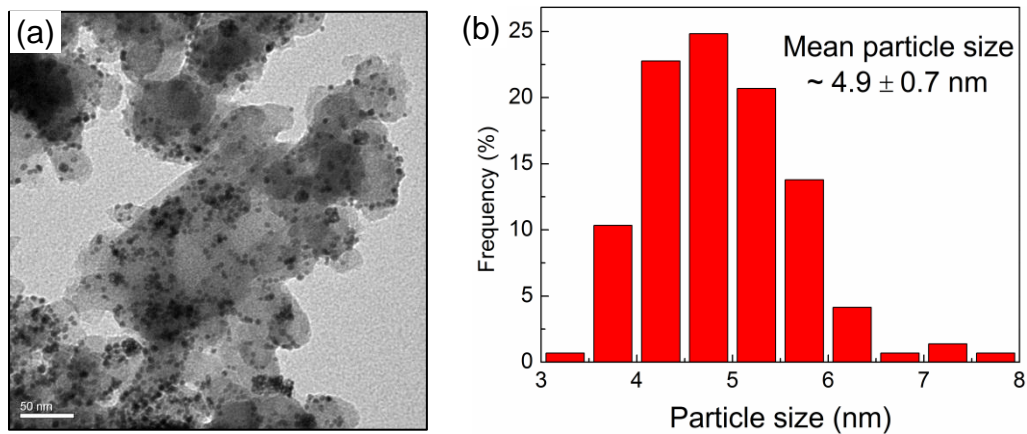

Figure S4. (a) TEM image and (b) histograms of particle size distribution of as-synthesized Pt<sub>1.8</sub>Co/C catalyst sample.

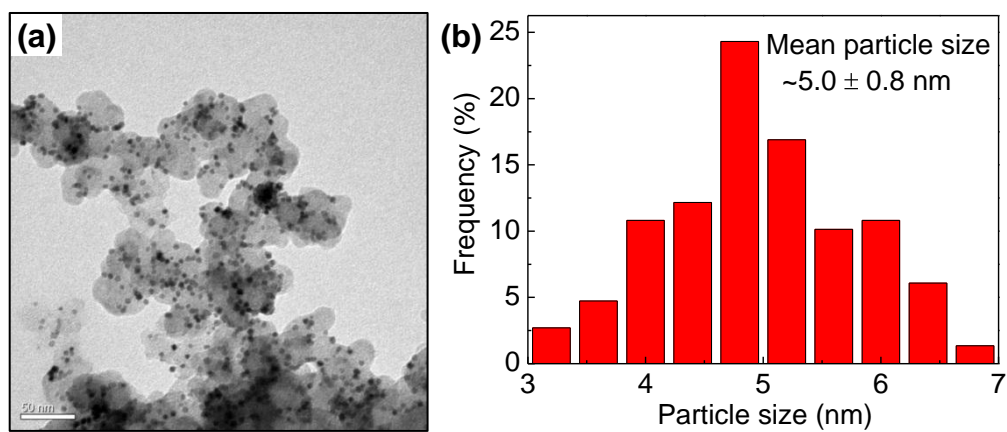

Figure S5. (a) TEM image and (b) histograms of particle size distribution of as-synthesized PtCo/C catalyst sample.

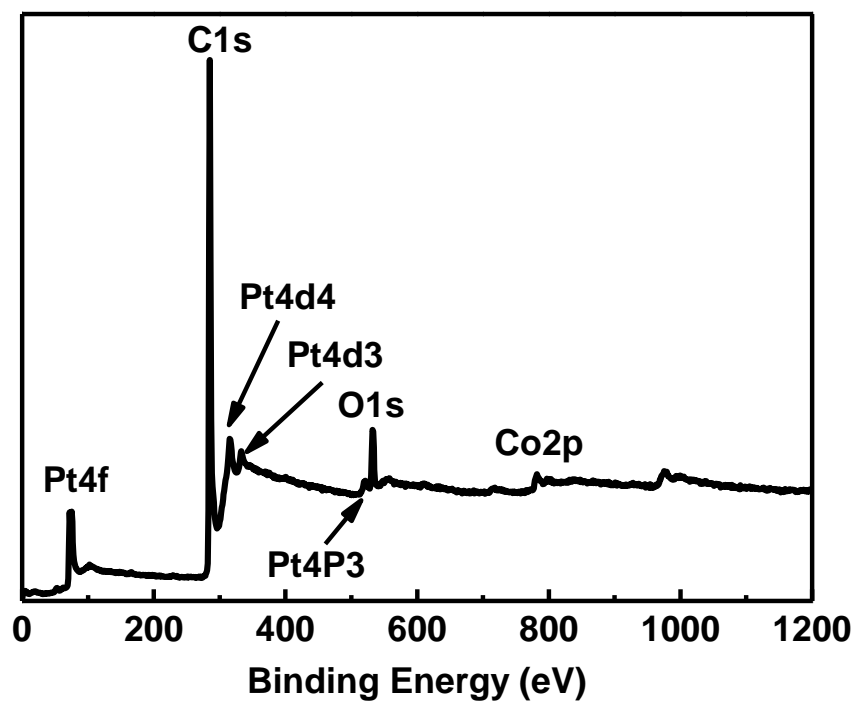

Figure S6. XPS survey spectrum of Pt<sub>1.2</sub>Co/C.



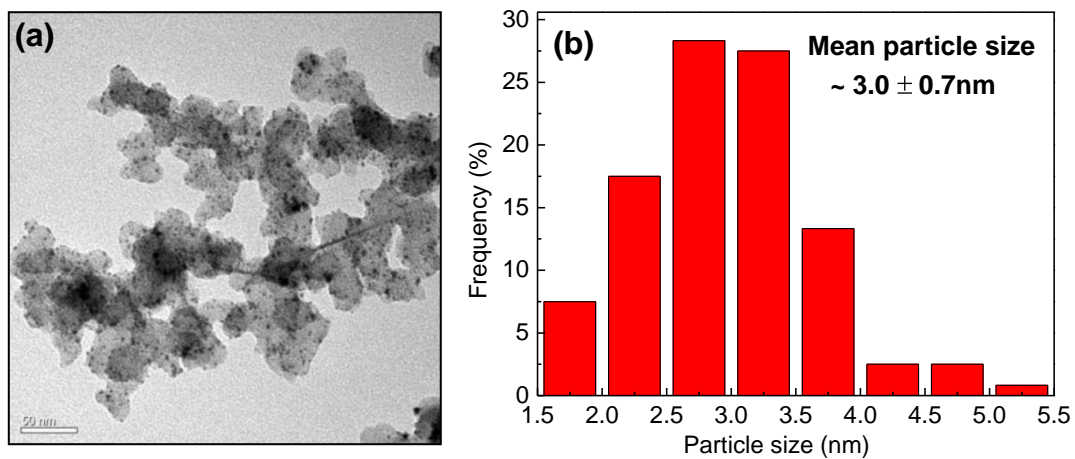

Figure S7. (a) Typical TEM image and (b) histograms of particle size distribution of Johnson Matthey (JM) commercial Pt/C catalyst.

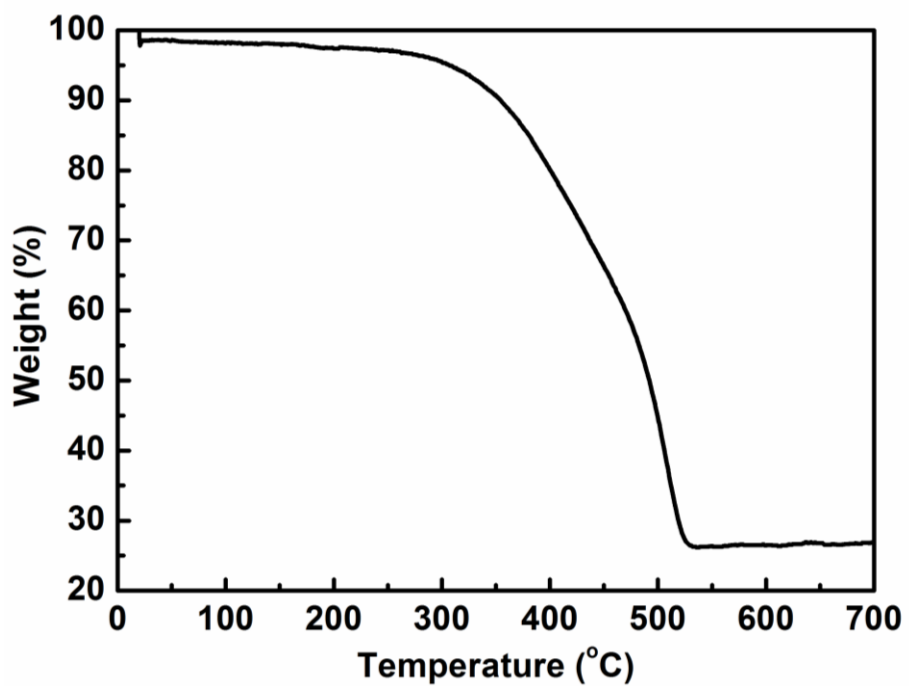

Figure S8. Thermal gravimetric (TG) curve of Pt<sub>1.2</sub>Co/C at a heating rate of 5°C/min.

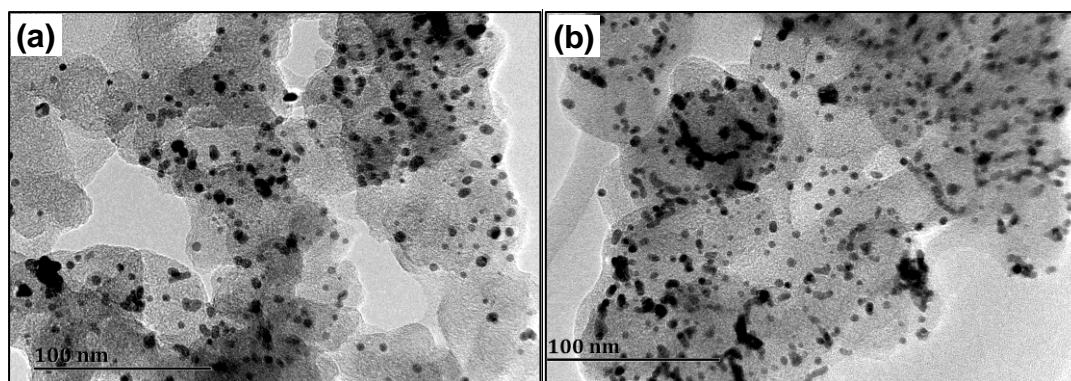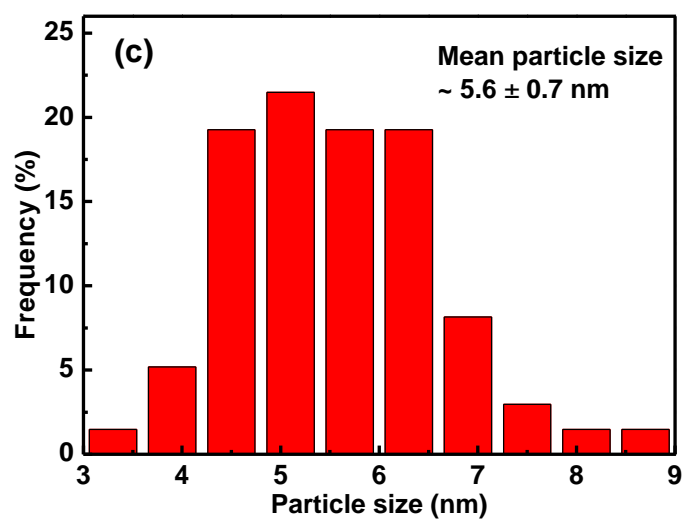

Figure S9. TEM images (a, b) and histograms of particle size distribution (c) of Pt<sub>1.2</sub>Co/C catalyst after stability evaluation for 3000s in 0.5 M H<sub>2</sub>SO<sub>4</sub> with 1.0 M methanol.
